# Supplementary material for: Spatial genomic diversity associated with APOBEC mutagenesis in squamous cell carcinoma arising from ovarian teratoma
Source: PubMed Central journal article supplement — Cancer Sci. 2023 Feb 21;114(5):2145–57. doi: 10.1111/cas.15754 (PMC10154883; doi:10.1111/cas.15754), 2023-02-21

## **Supplementary Figure**

**Spatial genomic diversity associated with APOBEC mutagenesis in squamous cell carcinoma arising from ovarian teratoma**

**Supplementary Figure 1. Representative images of immunohistochemical staining for p53 in case 1**  
p53 protein overexpression was observed in epithelial components of all samples, but not in stromal components (100X magnification).

**Non-malignant epithelium  
distant from cancer-sites**

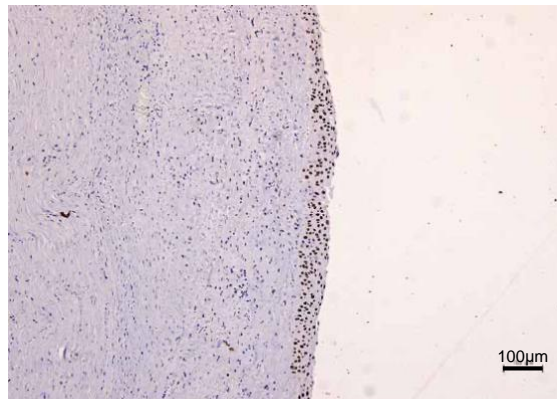

**Non-malignant epithelium  
close to cancer-sites**

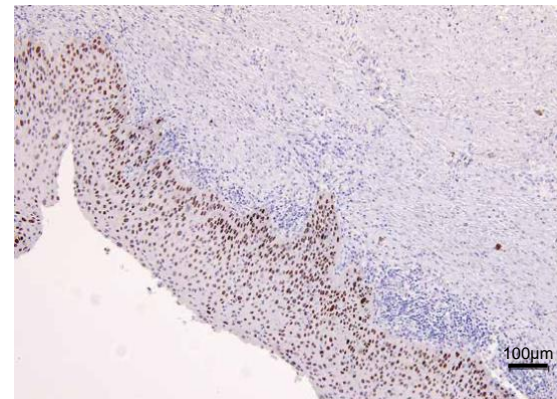

**Keratinizing SCC**

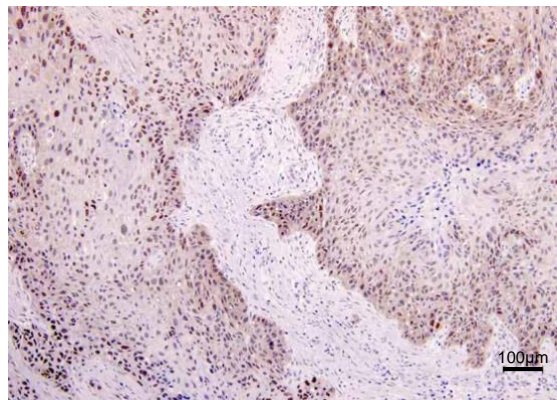

**Nonkeratinizing SCC**

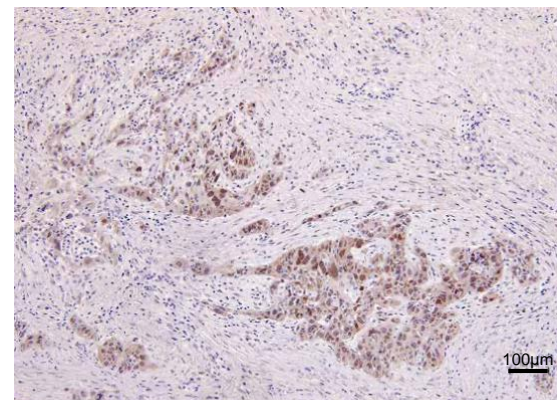

## Supplementary Figure 2. Somatic copy number alterations in case 1

A. Genome-wide profiles of somatic copy number alterations in the five samples. Vertical lines correspond to chromosome numbers.

B. Genome-wide profiles of copy number change relative to ploidy in the five samples. Vertical lines correspond to chromosome numbers.

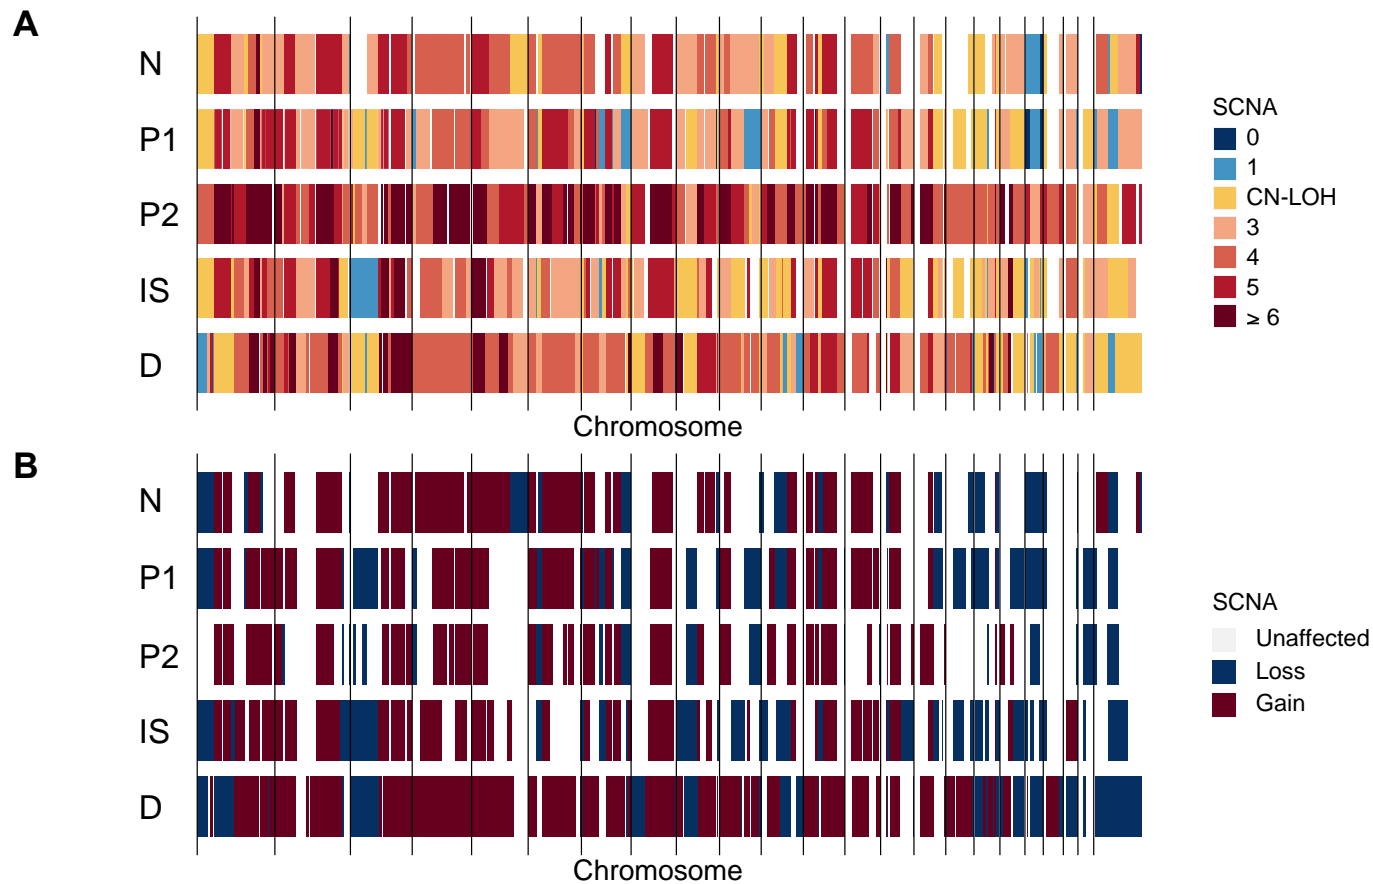

### Supplementary Figure 3. A loupe image of Kera2 and Nonkera1

A loupe image of Kera2, Nonkera1 and non-malignant epithelium in the same section is shown. Kera2 and Nonkera1 are outlined solid curves.

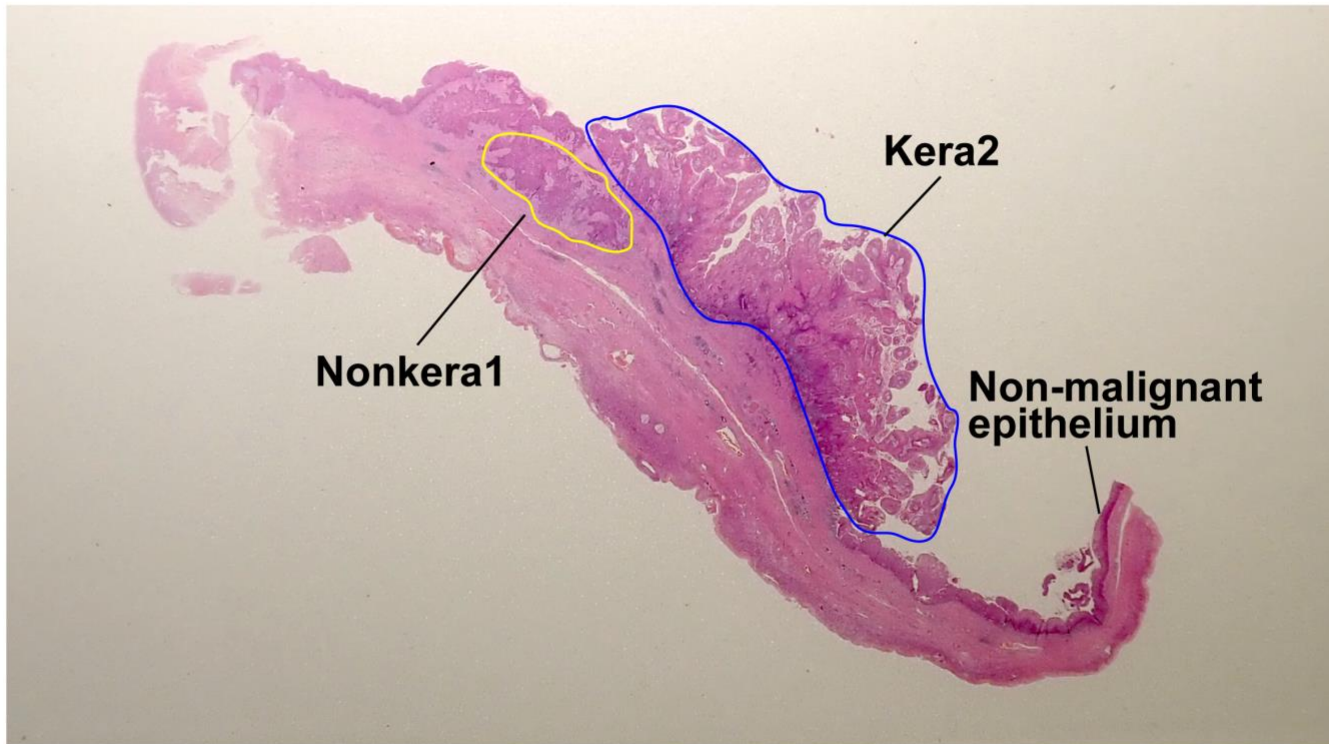

**Supplementary Figure 4. Representative images of immunohistochemical staining for p53 in case 2**  
p53 protein overexpression was observed in nonkeratinizing SCC but not in other components (200X magnification).

**Non-malignant epithelium  
distant from cancer-sites**

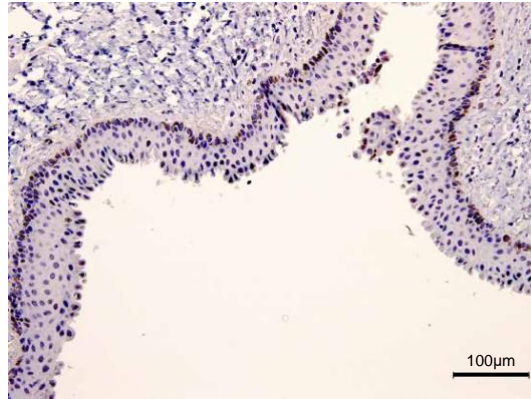

**Non-malignant epithelium  
close to cancer-sites**

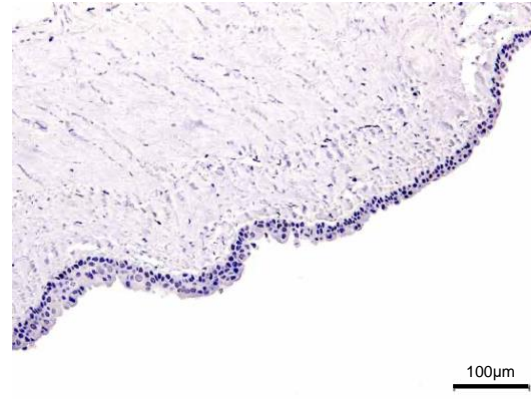

**Anaplastic carcinoma**

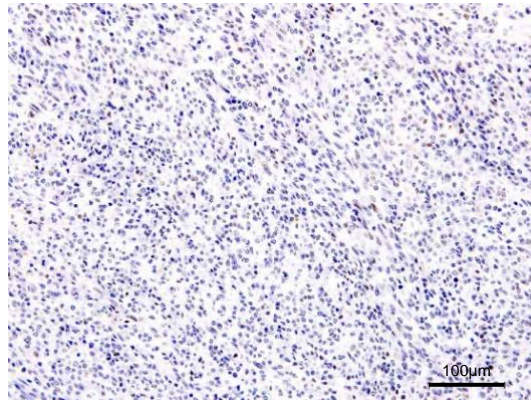

**Nonkeratinizing SCC**

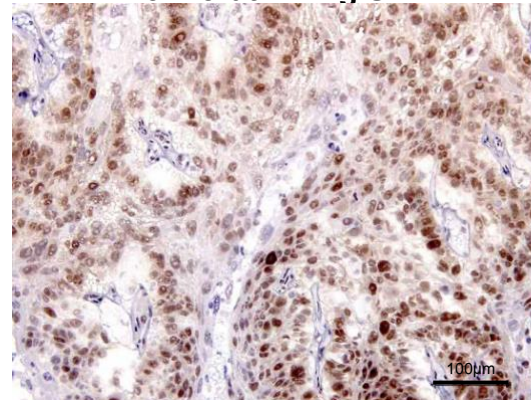

## Supplementary Figure 5. Somatic copy number alterations in case 2

A. Genome-wide profiles of somatic copy number alterations in the five samples. Vertical lines correspond to chromosome numbers.

B. Genome-wide profiles of copy number change relative to ploidy in the five samples. Vertical lines correspond to chromosome numbers.

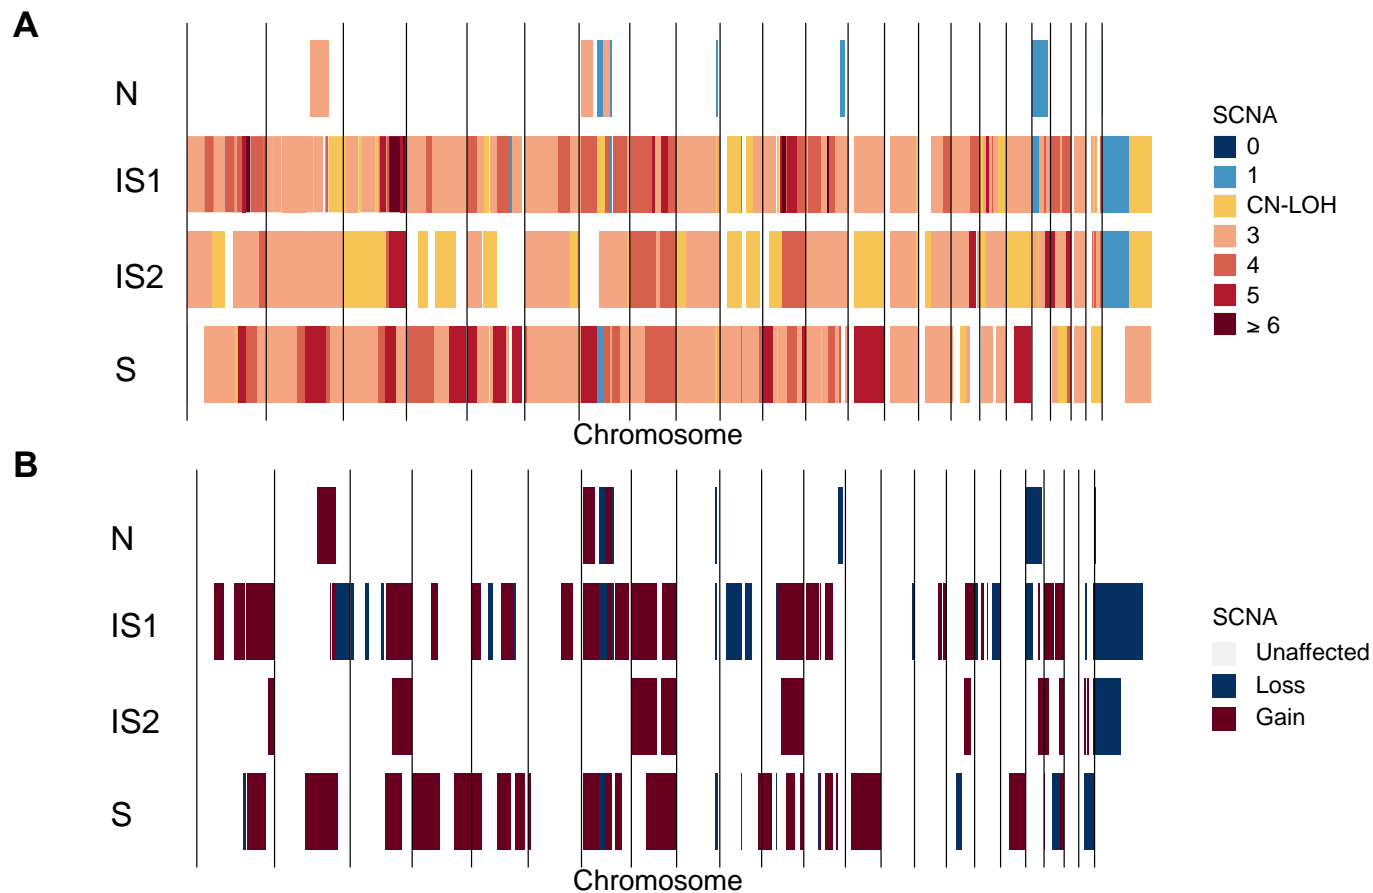

Supplement: CAS-114-2145-s002.pdf [file CAS-114-2145-s002.pdf]
